# Supplementary material for: Effective Method for a Graphene Oxide with Impressive Selectivity in Carboxyl Groups
Source: MDPI journal article supplement (doi:10.3390/nano12183112), 2022-09-08
Supplement: s1 [file s1]

## Supplementary Materials

# Effective Method for a Graphene Oxide with Impressive Selectivity in Carboxyl Groups

**Iluminada Rodríguez-Pastor <sup>1,2</sup>, Adelia López-Pérez <sup>1</sup>, María D. Romero-Sánchez <sup>1</sup>, Juana M. Pérez <sup>3</sup>, Ignacio Fernández <sup>3</sup> and Ignacio Martín-Gullón <sup>2,\*</sup>**

<sup>1</sup> Applynano Solutions, S.L. Alicante Scientific Park #3, 03690 Alicante, Spain

<sup>2</sup> Institute of Chemical Processes Engineering, University of Alicante, 03080 Alicante, Spain

<sup>3</sup> Research Centre CIAIMBITAL, University of Almería, 04120 Almería, Spain

\* Correspondence: gullon@ua.es

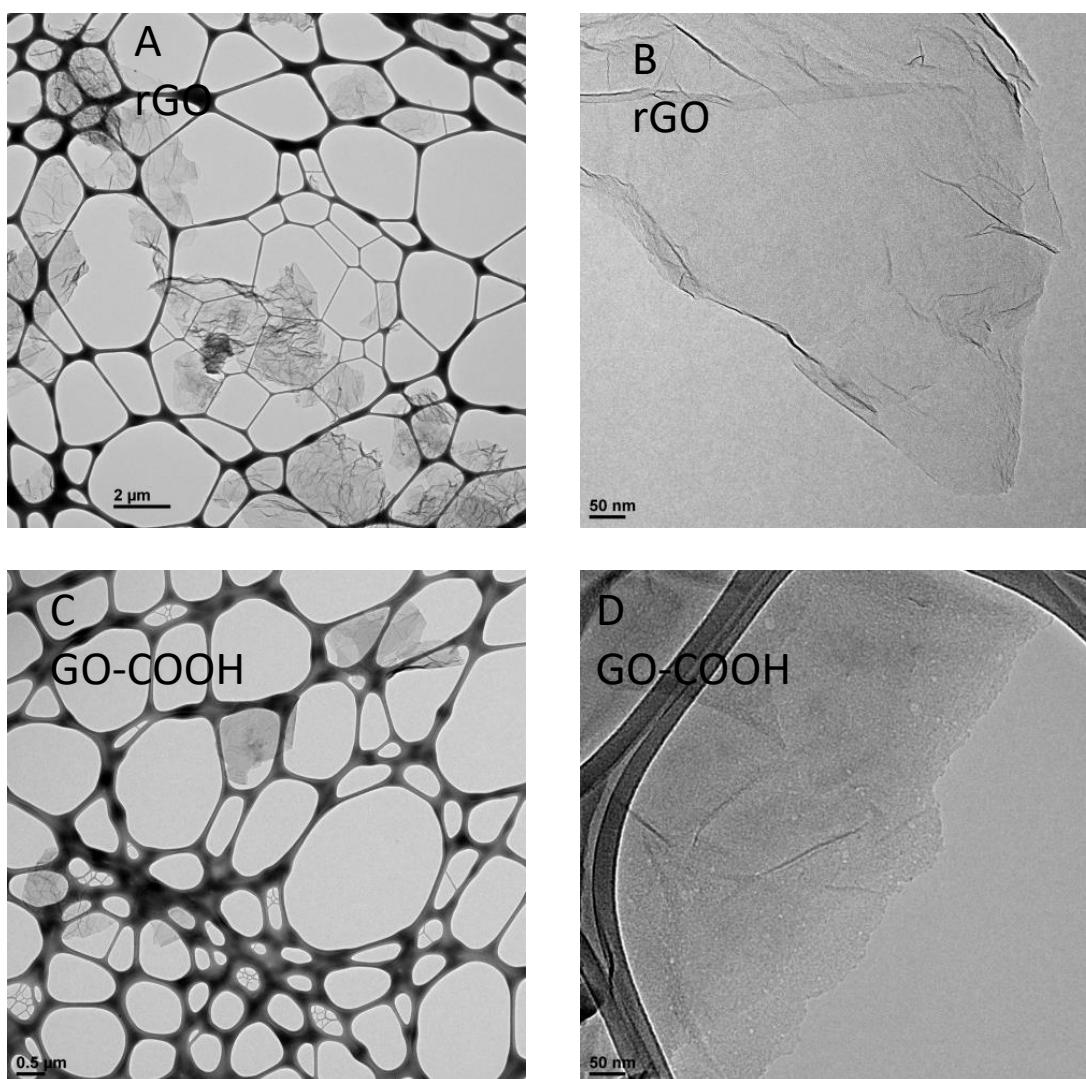

**Figure S1.** Lower (A, C) and higher magnification (B, D) with respect to TEM of main manuscript, respectively, of rGO and GO-COOH samples. GO-COOH does not present C-dots and present a similar size (comparison A vs. C) and a great number of defects with respect to parent rGO.

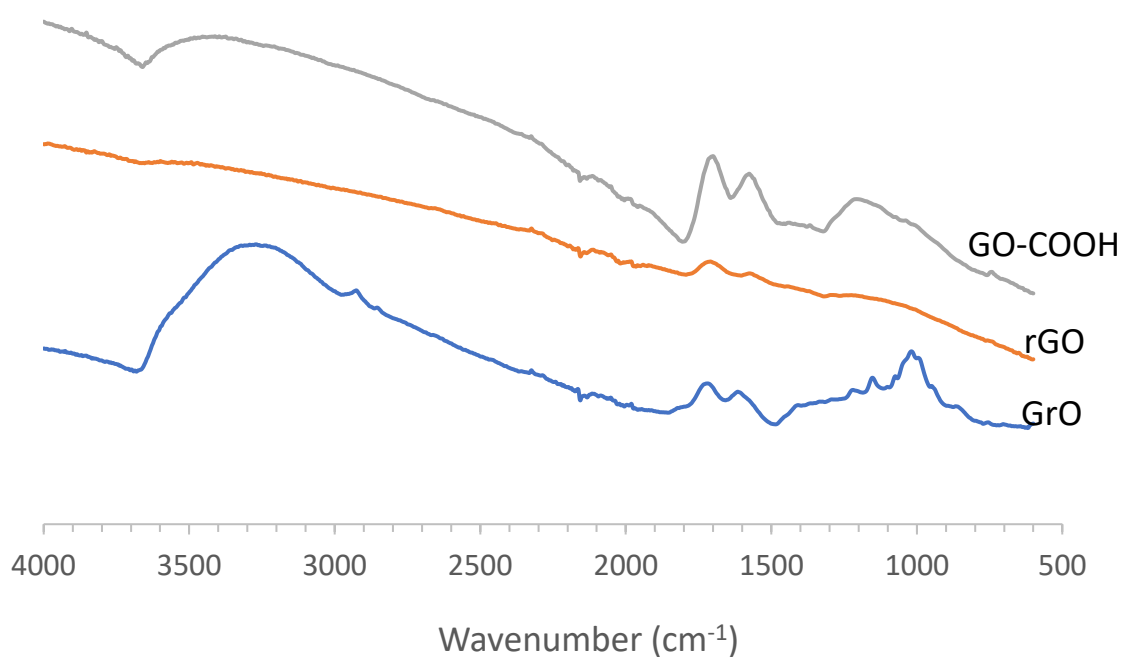

**Figure S2.** FTIR-ATR of powder samples of graphite oxide GrO, its derived microwave treated reduced Graphene oxide rGO, and carboxyl Graphene oxide GO-COOH derived from rGO. Hydroxyl band ( $3300$  and  $1200$ - $1000$   $\text{cm}^{-1}$ ) have more intensity than carbonyl/carboxyl ( $1700$   $\text{cm}^{-1}$ ) for parent GrO. Upon reduction, most of functionalities are lost, as shown in the flat pattern of rGO, leaving just a tiny reminder of GrO bands. However, potassium permanganate treatment of rGO (GO-COOH) yields higher intensity in carbonyl/carboxyl groups than starting GrO, and lower intensity for hydroxyl groups.

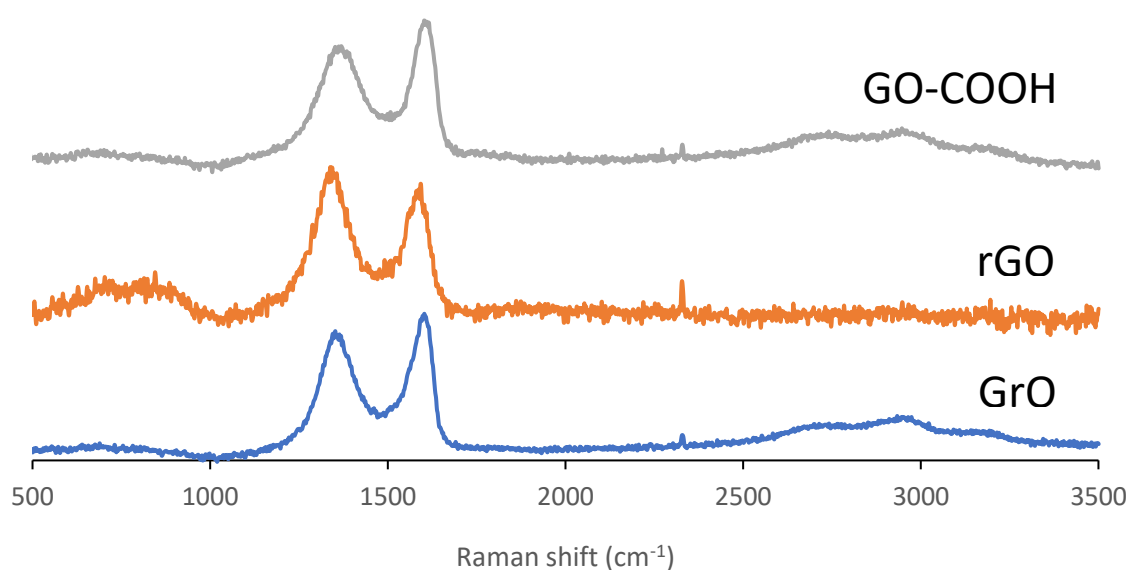

**Figure S3.** Raman spectra corresponding to powdered samples GrO and its derived rGO and GO-COOH.

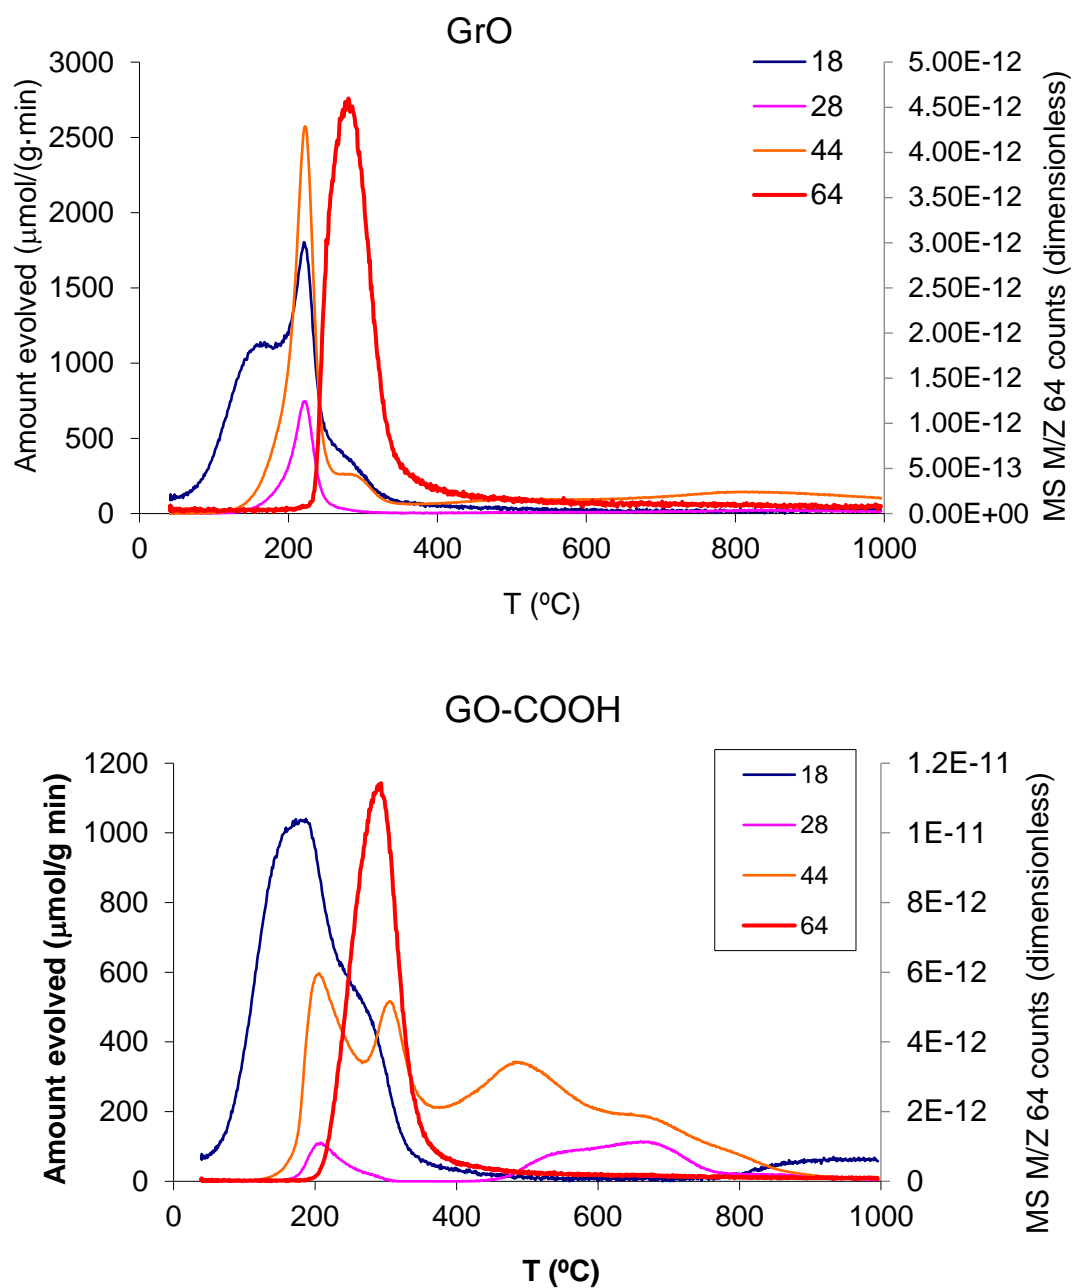

**Figure S4.** Quantified MS signals of 18 (H<sub>2</sub>O), 28 (CO) and 44 (CO<sub>2</sub>) plus the non-quantified signal of 64 (SO<sub>2</sub>) for GrO and GO-COOH.
